# Supplementary material
Source: PubMed Central journal article supplement (PMC3000286)
Supplement: 1004169107_pnas.201004169SI.pdf [file 1004169107_pnas.201004169SI.pdf]

# Supporting Information

Tzingounis et al. 10.1073/pnas.1004169107

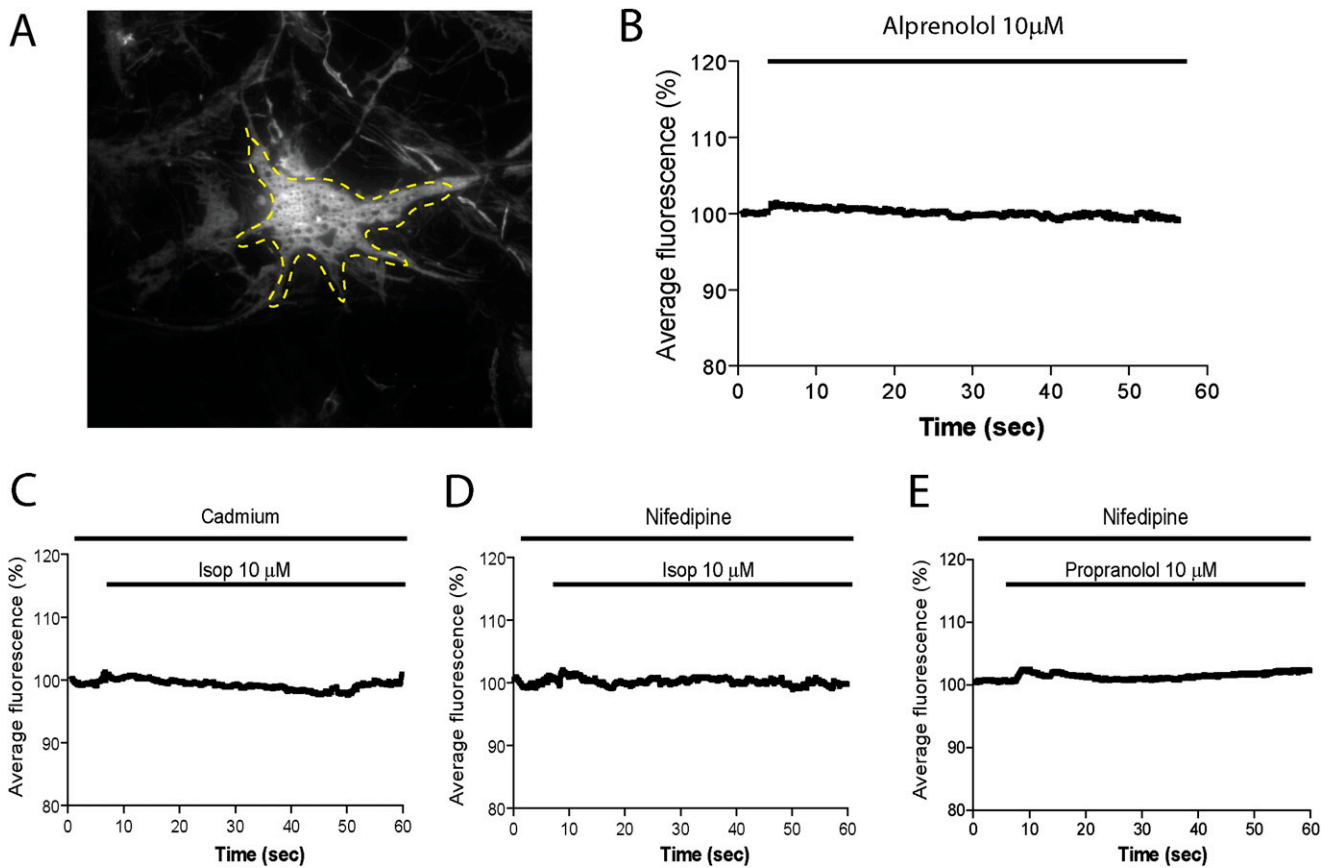

**Fig. S1.** (A) Isolated hippocampal neuron under TIRFM illumination with typical surface selection for intensity measurements including the cell body and proximal dendrites. Note that TIRFM illumination generates images of the cell surface in close proximity to the glass interface. Nonilluminated areas are not visible under this type of microscopy. (B) Time course of surface fluorescence intensity with the addition of 10  $\mu$ M alprenolol. (C) Surface fluorescence intensity was measured in cells preincubated with the inorganic voltage-gated calcium channel blocker cadmium (100  $\mu$ M). The addition of 10  $\mu$ M isoproterenol did not generate changes in basal calcium level. (D and E) Preincubation of hippocampal neurons with the specific L-type channel blocker nifedipine (5  $\mu$ M) effectively blocked the effects of isoproterenol (D) and propranolol (E).
